# Supplementary material
Source: publisher site journal article supplement (https://www.dovepress.com/get_supplementary_file.php?f=340284.docx)
Supplement: Supplementary file 1 [file get_supplementary_file.php]

|  | 3-year OS | | 5-year OS | |
| --- | --- | --- | --- | --- |
|  | White | Asian | White | Asian |
| Total | 0.847 (0.842, 0.852) | 0.864 (0.846, 0.883) | 0.782 (0.775, 0.789) | 0.812 (0.788, 0.837) |
| Age at diagnosis |  |  |  |  |
| <45 | 0.956 (0.948, 0.965) | 0.937 (0.900, 0.976) | 0.929 (0.916, 0.942) | 0.937 (0.900, 0.976) |
| 45-65 | 0.865 (0.858, 0.872) | 0.904 (0.881, 0.927) | 0.813 (0.804, 0.822) | 0.866 (0.836, 0.897) |
| >65 | 0.790 (0.781, 0.800) | 0.794 (0.760, 0.830) | 0.696 (0.683, 0.709) | 0.707 (0.661, 0.757 |
| Sex |  |  |  |  |
| Male | 0.833 (0.826, 0.839) | 0.862 (0.839, 0.884) | 0.761 (0.752, 0.770) | 0.813 (0.784, 0.843) |
| Female | 0.871 (0.863, 0.879) | 0.869 (0.837, 0.903) | 0.816 (0.806, 0.827) | 0.810 (0.766, 0.857) |
| Laterality |  |  |  |  |
| Left | 0.842 (0.835, 0.849) | 0.857 (0.831, 0.884) | 0.776 (0.767, 0.786) | 0.792 (0.755, 0.830) |
| Right | 0.852 (0.845, 0.859) | 0.872 (0.846, 0.898) | 0.787 (0.777, 0.797) | 0.833 (0.801, 0.866) |
| Histological stage |  |  |  |  |
| Localized | 0.938 (0.933, 0.942) | 0.953 (0.939, 0.967) | 0.889 (0.883, 0.896) | 0.919 (0.898, 0.941) |
| Regional | 0.798 (0.785, 0.811) | 0.798 (0.746, 0.854) | 0.698 (0.680, 0.717) | 0.715 (0.647, 0.790) |
| Distant | 0.295 (0.275, 0.316) | 0.341 (0.267, 0.435) | 0.175 (0.155, 0.197) | 0.203 (0.131, 0.314) |
| Median Household income |  |  |  |  |
| Low | 0.830 (0.823, 0.838) | 0.868 (0.834, 0.904) | 0.766 (0.756, 0.776) | 0.816 (0.770, 0.864) |
| High | 0.865 (0.858, 0.872) | 0.862 (0.840, 0.884) | 0.799 (0.789, 0.808) | 0.810 (0.782, 0.840) |
| Surgery |  |  |  |  |
| Yes | 0.877 (0.872, 0.881) | 0.891 (0.874, 0.909) | 0.813 (0.806, 0.819) | 0.839 (0.815, 0.864) |
| No | 0.276 (0.249, 0.307) | 0.262 (0.163, 0.421) | 0.184 (0.156, 0.218) | 0.218 (0.121, 0.396) |

Table S1: 3-year and 5-year OS probabilities of in Asian and White patients with ccRCC (Before PSM)

Data were OS probability (95% CI); OS: overall survival; ccRCC: clear cell renal cell carcinoma; CI: confidence interval; PSM: propensity score matching

Table S2: 3-year and 5-year CSS probabilities of in Asian and White patients with ccRCC (Before PSM)

|  | 3-year CSS | | 5-year CSS | |
| --- | --- | --- | --- | --- |
|  | White | Asian | White | Asian |
| Total | 0.885 (0.880-0.889) | 0.892 (0.875-0.909) | 0.846 (0.840-0.852) | 0.859 (0.838-0.881) |
| Age at diagnosis |  |  |  |  |
| <45 | 0.961 (0.953-0.970) | 0.951 (0.918-0.985) | 0.943 (0.931-0.955) | 0.951 (0.918-0.985) |
| 45-65 | 0.891 (0.885-0.897) | 0.909 (0.887-0.932) | 0.857 (0.849-0.865) | 0.884 (0.857-0.912) |
| >65 | 0.853 (0.845-0.862) | 0.853 (0.822-0.884) | 0.800 (0.789-0.811) | 0.797 (0.756-0.841) |
| Sex |  |  |  |  |
| Male | 0.874 (0.868-0.880) | 0.887 (0.866-0.908) | 0.829 (0.821-0.836) | 0.856 (0.831-0.882) |
| Female | 0.903 (0.897-0.910) | 0.903 (0.874-0.933) | 0.874 (0.865-0.883) | 0.865 (0.826-0.905) |
| Laterality |  |  |  |  |
| Left | 0.881 (0.874-0.887) | 0.886 (0.862-0.910) | 0.841 (0.833-0.850) | 0.842 (0.810-0.876) |
| Right | 0.889 (0.883-0.895) | 0.899 (0.876-0.923) | 0.850 (0.842-0.858) | 0.877 (0.849-0.905) |
| Histological stage |  |  |  |  |
| Localized | 0.975 (0.973-0.978) | 0.972 (0.961-0.983) | 0.956 (0.952-0.9610 | 0.954 (0.938-0.971) |
| Regional | 0.843 (0.831-0.855) | 0.851 (0.803-0.901) | 0.769 (0.752-0.787) | 0.796 (0.735-0.861) |
| Distant | 0.314 (0.293-0.336) | 0.375 (0.299-0.472) | 0.193 (0.172-0.217) | 0.260 (0.181-0.375) |
| Median Household income |  |  |  |  |
| Low | 0.873 (0.867-0.880) | 0.892 (0.861-0.924) | 0.835 (0.827-0.844) | 0.845 (0.802-0.891) |
| High | 0.897 (0.891-0.903) | 0.892 (0.872-0.912) | 0.857 (0.849-0.865) | 0.864 (0.840-0.889) |
| Surgery |  |  |  |  |
| Yes | 0.913 (0.909-0.917) | 0.918 (0.902-0.933) | 0.876 (0.870-0.882) | 0.885 (0.865-0.906) |
| No | 0.321 (0.292-0.354) | 0.299 (0.189-0.472) | 0.232 (0.200-0.269) | 0.249 (0.139-0.445) |

Data were CSS probability (95% CI); CSS: cancer specific survival; ccRCC: clear cell renal cell carcinoma; CI: confidence interval; PSM: propensity score matching

Table S3: Basic characteristics of patients with ccRCC in the SEER database after PSM (Asian vs. White)

|  | Total | White | Asian | *P* |
| --- | --- | --- | --- | --- |
| N |  | 4758 | 1,586 |  |
| Age, year or n (%) |  |  |  |  |
| Median (IQR) | 61.00 (51.00, 69.00) | 61.00 (51.00, 69.00) | 61.00 (52.00,70.00) | *0.128* |
| <45 | 730 (11.51) | 548 (11.52) | 182 (11.48) | *0.619* |
| 45-65 | 3,122 (49.21) | 2,357 (49.54) | 765 (48.23) |  |
| >65 | 2,492 (39.28) | 1,853 (38.94) | 639 (40.29) |  |
| Sex, n (%) |  |  |  | *0.963* |
| Male | 4,353 (68.62) | 3,264 (68.60) | 1,089 (68.66) |  |
| Female | 1,991 (31.38) | 1,494 (31.40) | 497 (31.34) |  |
| Year of diagnosis, n (%) |  |  |  | *0.000* |
| 2010 | 1,006 (15.86) | 800 (16.81) | 206 (12.99) |  |
| 2011 | 1,006 (15.86) | 771 (16.20) | 235 (14.82) |  |
| 2012 | 1,062 (16.74) | 802 (16.86) | 260 (16.39) |  |
| 2013 | 1,085 (17.10) | 828 (17.40) | 257 (16.20) |  |
| 2014 | 1,095 (17.26) | 787 (16.54) | 308 (19.42) |  |
| 2015 | 1,090 (17.18) | 770 (16.18) | 320 (20.18) |  |
| Laterality, n (%) |  |  |  | *0.873* |
| Left | 3,249 (51.21) | 2,434 (51.16) | 815 (51.39) |  |
| Right | 3,095 (48.79) | 2,324 (48.84) | 771 (48.61) |  |
| Histological stage, n (%) |  |  |  | *0.825* |
| Localized | 4,686 (73.87) | 3,522 (74.02) | 1,164 (73.39) |  |
| Regional | 1,038 (16.36) | 777 (16.33) | 261 (16.46) |  |
| Distant | 620 (9.77) | 459 (9.65) | 161 (10.15) |  |
| Tumor Gradea, n (%) |  |  |  | *0.817* |
| I-II | 3,575 (56.35) | 2,691 (56.56) | 884 (55.74) |  |
| III-IV | 2,070 (32.63) | 1,548 (32.53) | 522 (32.91) |  |
| Unknown | 699 (11.02) | 519 (10.91) | 180 (11.35) |  |
| T stage, n (%) |  |  |  | *0.737* |
| T1 | 4,229 (66.66) | 3,175 (66.73) | 1,054 (66.46) |  |
| T2 | 675 (10.64) | 505 (10.61) | 170 (10.72) |  |
| T3 | 1,361 (21.45) | 1,023 (21.50) | 338 (21.31) |  |
| T4 | 79 (1.25) | 55 (1.16) | 24 (1.51) |  |
| N stage, n (%) |  |  |  | *0.191* |
| N0 | 6,151 (96.96) | 4,621 (97.12) | 1,530 (96.47) |  |
| N1 | 193 (3.04) | 137 (2.88) | 56 (3.53) |  |
| M stage, n (%) |  |  |  | *0.556* |
| M0 | 5,732 (90.35) | 4,305 (90.48) | 1,427 (89.97) |  |
| M1 | 612 (9.65) | 453 (9.52) | 159 (10.03) |  |
| Median household income, n (%) |  |  |  | *0.913* |
| Low | 1,985 (31.29) | 1,487 (31.25) | 498 (31.40) |  |
| Highb | 4,359 (68.71) | 3,271 (68.75) | 1,088 (68.60) |  |
| Marital status, n (%) |  |  |  | *0.311* |
| Never married | 882 (13.90) | 678 (14.25) | 204 (12.86) |  |
| Married | 4,618 (72.79) | 3,442 (72.34) | 1,176 (74.15) |  |
| SDW | 844 (13.30) | 638 (13.41) | 206 (12.99) |  |
| Insurance status, n (%) |  |  |  | *0.775* |
| Any Medicaid | 936 (14.75) | 695 (14.61) | 241 (15.20) |  |
| Insured | 5,264 (82.98) | 3,957 (83.17) | 1,307 (82.41) |  |
| Uninsured | 144 (2.27) | 106 (2.23) | 38 (2.40) |  |
| Surgery, n (%) |  |  |  | *0.888* |
| No | 284 (4.48) | 214 (4.50) | 70 (4.41) |  |
| Yes | 6,060 (95.52) | 4,544 (95.50) | 1,516 (95.59) |  |

CcRCC: clear cell renal cell carcinoma; SEER: Surveillance, Epidemiology, and End Results; PSM: propensity score matching; IQR: interquartile range; SDW: separated, divorced or widowed.

aGrade I: Well differentiated; Grade II: Moderately differentiated; Grade III: Poorly differentiated; Grade IV: Undifferentiated.

bhigh Median household income: defined by earnings above the median value in this sample.

Table S4: 3-year and 5-year OS probabilities of in Asian and White patients with ccRCC (After PSM)

|  | 3-year OS | | 5-year OS | |
| --- | --- | --- | --- | --- |
|  | White | Asian | White | Asian |
| Total | 0.864 (0.854, 0.875) | 0.864 (0.846, 0.883) | 0.803 (0.789, 0.817) | 0.812 (0.788, 0.837) |
| Age at diagnosis |  |  |  |  |
| <45 | 0.966 (0.95, 0.983) | 0.937 (0.900, 0.976) | 0.945 (0.920, 0.970) | 0.937 (0.900, 0.976) |
| 45-65 | 0.878 (0.863, 0.892) | 0.904 (0.881, 0.927) | 0.828 (0.809, 0.847) | 0.866 (0.836, 0.897) |
| >65 | 0.818 (0.800, 0.837) | 0.794 (0.760, 0.830) | 0.733 (0.708, 0.758) | 0.707 (0.661, 0.757) |
| Sex |  |  |  |  |
| Male | 0.858 (0.845, 0.871) | 0.862 (0.839, 0.884) | 0.793 (0.776, 0.811) | 0.813 (0.784, 0.843) |
| Female | 0.878 (0.860, 0.896) | 0.869 (0.837, 0.903) | 0.824 (0.801, 0.848) | 0.810 (0.766, 0.857) |
| Laterality |  |  |  |  |
| Left | 0.858 (0.844, 0.873) | 0.857 (0.831, 0.884) | 0.811 (0.792, 0.830) | 0.792 (0.755, 0.830) |
| Right | 0.871 (0.856, 0.885) | 0.872 (0.846, 0.898) | 0.795 (0.775, 0.817) | 0.833 (0.801, 0.866) |
| Histological stage |  |  |  |  |
| Localized | 0.943 (0.934, 0.951) | 0.953 (0.939, 0.967) | 0.903 (0.890, 0.915) | 0.919 (0.898, 0.941) |
| Regional | 0.823 (0.794, 0.853) | 0.798 (0.746, 0.854) | 0.700 (0.658, 0.746) | 0.715 (0.647, 0.790) |
| Distant | 0.332 (0.287, 0.383) | 0.341 (0.267, 0.435) | 0.341 (0.267, 0.435) | 0.203 (0.131, 0.314) |
| Median Household income |  |  |  |  |
| Low | 0.853 (0.834, 0.872) | 0.868 (0.834, 0.904) | 0.792 (0.767, 0.817) | 0.816 (0.770, 0.864) |
| High | 0.869 (0.857, 0.882) | 0.862 (0.840, 0.884) | 0.808 (0.791, 0.826) | 0.810 (0.782, 0.840) |
| Surgery |  |  |  |  |
| Yes | 0.889 (0.879, 0.899) | 0.891 (0.874, 0.909) | 0.830 (0.816, 0.844) | 0.839 (0.815, 0.864) |
| No | 0.339 (0.276, 0.417) | 0.262 (0.163, 0.421) | 0.210 (0.148, 0.299) | 0.218 (0.121, 0.396) |

Data were OS probability (95% CI); OS: overall survival; ccRCC: clear cell renal cell carcinoma; CI: confidence interval; PSM: propensity score matching

Table S5: 3-year and 5-year CSS probabilities of in Asian and White patients with ccRCC (After PSM)

|  | 3-year CSS | | 5-year CSS | |
| --- | --- | --- | --- | --- |
|  | White | Asian | White | Asian |
| Total | 0.899 (0.890-0.908) | 0.892 (0.875-0.909) | 0.862 (0.850-0.874) | 0.859 (0.838-0.881) |
| Age at diagnosis |  |  |  |  |
| <45 | 0.973 (0.959-0.988) | 0.951 (0.918-0.985) | 0.951 (0.928-0.975) | 0.951 (0.918-0.985) |
| 45-65 | 0,897 (0.883-0.910) | 0.909 (0.887-0.932) | 0.864 (0.847-0.881) | 0.884 (0.857-0.912) |
| >65 | 0.880 (0.864-0.896) | 0.853 (0.822-0.884) | 0.834 (0.813-0.855) | 0.797 (0.756-0.841) |
| Sex |  |  |  |  |
| Male | 0.893 (0.881-0.904) | 0.887 (0.866-0.908) | 0.853 (0.838-0.869) | 0.856 (0.831-0.882) |
| Female | 0.912 (0.897-0.927) | 0.903 (0.874-0.933) | 0.881 (0.861-0.901) | 0.865 (0.826-0.905) |
| Laterality |  |  |  |  |
| Left | 0.894 (0.881-0.908) | 0.886 (0.862-0.910) | 0.873 (0.858-0.889) | 0.842 (0.810-0.876) |
| Right | 0.903 (0.891-0.917) | 0.899 (0.876-0.923) | 0.851 (0.833-0.870) | 0.877 (0.849-0.905) |
| Histological stage |  |  |  |  |
| Localized | 0.979 (0.974-0.984) | 0.972 (0.961-0.983) | 0.964 (0.956-0.972) | 0.954 (0.938-0.971) |
| Regional | 0.863 (0.837-0.891) | 0.851 (0.803-0.901) | 0.770 (0.730-0.812) | 0.796 (0.735-0.861) |
| Distant | 0.341 (0.296-0.394) | 0.375 (0.299-0.472) | 0.200 (0.152-0.264) | 0.260 (0.181-0.375) |
| Median Household income |  |  |  |  |
| Low | 0.892 (0.875-0.909) | 0.892 (0.861-0.924) | 0.853 (0.831-0.875) | 0.845 (0.802-0.891) |
| High | 0.902 (0.891-0.913) | 0.892 (0.872-0.912) | 0.866 (0.852-0.881) | 0.864 (0.840-0.889) |
| Surgery |  |  |  |  |
| Yes | 0.921 (0.913-0.930) | 0.918 (0.902-0.933) | 0.887 (0.876-0.899) | 0.885 (0.865-0.906) |
| No | 0.403 (0.336-0.483) | 0.299 (0.189-0.472) | 0.283 (0.209-0.384) | 0.249 (0.139-0.445) |

Data were OS probability (95% CI); CSS: cancer specific survival; ccRCC: clear cell renal cell carcinoma; CI: confidence interval; PSM: propensity score matching
